# Supplementary material for: Diagnosis of winter precipitation types using Spectral Bin Model (SBM): Comparison of five methods using ICE-POP 2018 field experiment data
Source: Copernicus journal article supplement (doi:10.5194/gmd-2024-179), 2024-11-06
Supplement: Supplementary file [file gmd-2024-179-AC1-supplement.pdf]

## Response to Reviewer

31 January 2025

### Overview:

The manuscript compared the performance of five different schemes for identifying winter precipitation types (limited to rain, snow, and mixed rain-snow) using data from the ICE-POP 2018 field experiments. The study demonstrated that an enhanced spectral bin model (SBM) provided relatively better results. While the manuscript contains valuable analyses and experimental results, the current presentation and English writing do not meet the publication quality. A major revision is recommended. Thorough proofreading will improve the manuscript greatly. Many places require further editing and some editing examples have been provided.

Dear Referee,

We sincerely appreciate the time and effort you devoted to reading our study and providing thoughtful, detailed feedback. Your insightful comments and constructive suggestions have significantly contributed to enhancing the clarity, depth, and overall quality of my work. Thank you for sharing your expertise and for your valuable guidance throughout this process. Your input has been invaluable in shaping our research, and we are grateful for your support.

Best regards,

Wonbae Bang (on behalf of the author team)

## Major Comments:

### **1. The "hit rate" alone does not reveal the full picture. Suggest adding the False Alarm Rate (FAR) to get a better picture of the performance of different schemes**

We add additional skill scores considering 'false alarms': CSI (critical success index) and FAR (false alarm rate). CSI and FAR are calculated about 9 categories (3 precipitation types for 3 regions — all/mountain/coastal) and Table 3, 4 are included in section 4.1 Overall accuracy of the diagnosed precipitation types. Also, the calculation method of CSI and FAR is included in section 3.3 Evaluation method. Section 5. Summary and future work section is also modified.

(orange color text between lines 337~343, 419~429, 607, and 624~625 in the revision file)

### **2. There are too many uncommon acronyms in the manuscript. Suggest reverting some of them back to their original forms as much as possible (acronyms in equations may be kept) to help readers understand easily.**

WL -> warm layers, IL -> warm layer, CL -> cold layer, R-> rainfall rate, SR -> snowfall rate, etc

**Also, it will be good to add a "List of Acronyms"**

We reverted WL, IL, and CL, but maintained our use of R and SR because they are widely used expressions. We included a 'List of Acronyms' between 'code and data availability' and 'author contribution'.

(orange text on line 645 in the revision file)

### **3. The hydrometeor falling velocity is usually called the "terminal velocity" and referred to as "Vt" instead of "Vf".**

We reverted the expression following your suggestion.

**4. Lines 92-93: "Tw-Flow nomogram (Sims and Liu, 2015) methods" -> Need to be consistent in the manuscript on how to refer to this method, either "the Tw-Flow method" or "the Sims and Liu method". Avoid using different names in different locations (such as lines 355, 566 etc) for the same method. Revise similarly for other methods throughout the manuscript.**

. We agree that "consistence for naming method should be required", we modified "relating words" in this way: "variable"+ method.

**Line 24: "The results show that the SBM has the highest overall skill score for winter precipitation": SBM did not outperform all other 4 schemes in all situations as demonstrated in the manuscript. Please revise accordingly.**

We revise the contents more exactly.

(orange text between lines 24~26 in the revision file)

**Line 29: "which uses climatological relationships for Colorado region" -> "which uses a snow density-diameter relationship for the Colorado region".**

We modified the text following your suggestion.

(orange text between lines 29~30 in the revision file)

**Line 73: "The addition of sublimation and evaporation is predicated on the idea that these processes may..." -> "The addition of sublimation and evaporation is because these processes may..."**

We modified the text following your suggestion.

**Lines 87-88: "the intensive observation data density..." -> "The high-density observational data provided by the ICE-POP network enables a comprehensive evaluation and refinement of previously proposed WPT diagnostic methods."**

We modified the text following your suggestion.

**Lines 142-143: "a low-speed mode ... of graupel or hail": Why hail has a low fall velocity (terminal velocity)?**

Following Nagumo and Fujiyoshi (2015), the liquid water fraction of an ice pellet relates to the terminal fall velocity mode. If the surface of an ice pellet is frozen but the inside of the ice pellet remains water, its terminal fall velocity is similar to that of a raindrop (i.e., high-speed mode). If most of the ice pellet is frozen, the ice pellet will have a similar fall speed to small hail or graupel (i.e., low-speed mode).

Reference

Nagumo, N., and Y. Fujiyoshi. Microphysical properties of slow-falling and fast-falling ice pellets formed by freezing associated with evaporative cooling, *Mon. Wea. Rev.*, 143(11), 4376-4392, <https://doi.org/10.1175/MWR-D-15-0054.1>, 2015.

**Fig. 2: "Fsite" is not defined in Fig. 2b**

We added an explanation about Fsite.

(orange text between lines 189~190 in the revision file)

**Line 172: How is the "normalized frequency" computed?**

We added an explanation about the calculation of normalized frequency.

(orange text between lines 184~185 in the revision file)

**Line 177: why is a threshold value of "0.05" critical? How do we get this threshold?**

Although we select only pure rain events, observation/measurement errors may exist and sometimes can produce outlier values. A threshold of 0.05 was chosen to exclude these outliers.

**Lines 249-250: "For example, ...": (1) Based on Fig.4d, Zero Tw and a lapse rate of 6 °C/km correspond to about 80% probability. Where did the "probability of 0.86" come from? "0.45" is not accurate either, (2) Suggest adding a zero Tw line to help users examine Fig4d.**

We added grid lines in Fig.4d, and changed examples to easily readable values.

(orange text between lines 266~268 in the revision file)

**Lines 259-261: This sentence is redundant or it should appear where the Tw0-Flow method was first introduced.**

We simplified the sentence and complemented the first introduction of the Tw0-Flow method by including an additional explanation.

(orange text on lines 52~53, 275 in the revision file)

**Line 286: How were the rainfall rate and the snowfall rate data obtained?**

The SBM simulates PSD evolution from the cloud top (initial PSD is following Table 2) to ground level. Rainfall rate and snowfall rate are calculated from the simulated ground PSD. We complement the sentence by including an additional explanation.

(orange text between lines 300~301 in the revision file)

**Lines 408-413: "For RASN, ...": The last sentence should be moved to the location before "For RASN..." and then revise the remain part accordingly.**

We changed the sequence of the sentences.

(orange text between lines 445~447 in the revision file)

**Line 314: What's the purpose of using  $h'$ ? It looks like  $h'$  is not needed since the hit rates were calculated individually for SN, RASN and RA and plotted in figures (such as Fig. 6) which are enough for the discussions.**

Because of the different number of events of each type (SN: 90, RASN: 15, RA: 26 in Table 1), the overall  $h$  value can be distorted.  $h'$  is less influenced by the different number of events of each type and serves as a complement to the  $h$  score. For example, consider the case where a specific method has predictions of SN and RA are perfect but RASN has no hits. In that case,  $h$  is very high (88.5%) whereas  $h'$  is 66.7%. Introducing  $h'$  can make a balanced evaluation.

**Line 340: "We evaluate the accuracy of the H850 method": "Accuracy" has a special meaning and formula in statistics. Suggest changing the "accuracy" to "performance" or similar words throughout the manuscript.**

We modified the sentences to use 'evaluate' and 'performance' together.

**Lines 346-351: What is the conclusion from this discussion (about different thresholds for the Tw0-Flow method)? If there are no conclusions from this discussion, it may be removed.**

We tested various critical values (10% 20% 30%, 0.1 0.2 0.3) for diagnosing winter precipitation type by using the Tw/Tw - Flow methods. Therefore, we displayed performance using the 20% or 30% (0.2 or 0.3) critical values together for readers. Tw has the best performance at 10%, and Tw - Flow with 0.1 has very stable results ( $h$  and  $h'$  are very similar values) and the best  $h'$ . Therefore, we used this to decide the critical values (10% for Tw, 0.1 for Tw - Flow).

**Lines 364-365: "The Tw0 method exhibits a relatively large difference between  $h$  (86.3 %) and  $h'$  (68.4 %), with the inclusion of Tw0 improving the diagnosis of SN (Figs. 6c and 6d).": (1) it discussed two conclusions in one sentence and does not read well; (2) this sentence can be removed without any evident impact.**

Because the accuracy of SN for methods that include  $T_{w0}$  ( $T_{w0}$  method,  $T_{w0}$ -Flow method) is much higher than those that do not include  $T_{w0}$  ( $H_{850}$  and  $RH_0$ - $T_0$  methods). We supplement the sentence.

(orange text between lines 377~378 in the revision file)

**Lines 364-367: The low performance in diagnosing RASN in Fig. 6c (the Tw0 method) should be highlighted here and  $h'$  is not needed.**

We deleted 'reducing  $h'$ ' and include the skill score for RASN in the sentence.

(orange text between lines 378~379 in the revision file)

**Lines 367-368: "This is supported by...(Sims and Liu, 2015)." This logic here is not clear. Consider revising.**

The following sentence is the reason (The 90 % conditional probability of SN for land areas varies from  $T_{w0} = -0.1$  °C at  $\Gamma_{low} = 11$  °C km<sup>-1</sup> to  $T_{w0} = -4.1$  °C at  $\Gamma_{low} = -5$  °C km<sup>-1</sup>). Therefore, the critical value ( $T_{w0} = 0.5$  °C ) is warmer than the statistics indicated. We have improved the logical flow of the relevant sentences.

(orange text between lines 379~381 in the revision file)

**Fig. 6: "0(0.0%)" labels can be removed from the figure.**

We modified this following your suggestion.

**Lines 391-395: "The dependence of the skill scores on the terrain for all five methods is also explored...: The paragraph before this one already discussed the impact of terrain on the skill scores. Consider revising to make the logic smoother or merging this paragraph to the previous one.**

We modified this following your letter suggestion (merging this paragraph).

**Lines 395-435: These paragraphs did not discuss the "dependence on wet-bulb temperature profiles" and hence should be placed before section 4.2. Either put them in section 4.1 or add a new section.**

In this section, the data distribution analysis of Fig. 9 is very important for interpretation of Fig.10~12 because characteristics of the Tw profile strongly influence values of H850, RH0-T0, Tw0, Tw0- $\Gamma_{low}$ .

**Line 407: "In contrast": I don't think there is an evident "contrast" here. It is safe to remove it.**

We modified the text following your suggestion.

**Lines 417-420: Two sentences here, and the second one repeats the first one.**

We modified the text following your suggestion.

**Line 425: "The Flow of RA varies widely, though it tends toward negative values": Fig. 9d showed that most Flow values are positive. So why it is stated "tends toward negative values"?**

This part was a mistake. We have modified negative -> positive.

**Fig. 10: remove the "RA" legend as there are no RA cases in this figure.**

We modified the figure following your suggestion.

**Lines 428 and 474: What is "complex atmospheric profiles" or "complex atmospheric vertical structure"? Need clarification on this.**

"Complex atmospheric vertical structure" refers to profiles with a melting layer aloft and a near-surface refreezing layer. We have expanded upon the sentence.

(orange text between lines 462~463 in the revision file)

**Table 3: Need a separating line between Group 1 and Group 2**

We modified the table following your suggestion.

**Fig. 13a,b,c: No discussion on these three figures in the manuscript. If not needed, they can be removed.**

Lines 504~508 already include a description of Fig. 13a,b,c. (submitted file)

**Fig. 14b, f: NO discussion on these two figures. If not needed, they can be removed.**

Lines 521~522 already include a description of Fig. 14b,f. (submitted file)



**Fig 14e,h: No description of these two figures in the figure caption.**

Lines 520~521 already include a description of Fig. 14e, while lines 547~548 include description of Fig. 14h. (submitted file)

**Line 540 Why define "Doppler velocity" as  $-V_r$  instead of  $V_r$ ?**

Our intention is for the Doppler velocity to be represented with the same sign with  $V_t$ .

**Line 542: Figs. 15c and 15d -> Figs. 15a and b**

We modified the text following your suggestion.

**Lines 582-583: Do you mean "These results suggested that SBM simulations tend to produce less melting compared to the observed precipitation"?**

Yes, that's correct. We modified the text following your suggestion.

**Lines 590-591: "The performance of the original SBM was superior to some existing optimized methods (the H850 and RH0-T0 nomogram methods)" -> add "some" before "existing" since SBM did not outperform all methods in all situations**

We modified the text following your suggestion.

**Lines: 592-593: (1) "should" -> "will"; (2) what does "other reanalysis filed data" refer to? (3) how would the 3D WPT algorithm differ from the 2D WPT algorithm?**

We correct should->will, and complement the sentence: other 3-dimensional reanalysis field data (Local Data Assimilation and Prediction System), and include additional sentence about utilization of 3D WPT.

(orange text between lines 630~633 in the revision file)

**Edits:**

**Line2 145-146: "very strong inversion strength" -> "very strong inversion"**

We modified the text following your suggestion.

**Line 269: "the next largest size" -> "the next larger size"**

We modified the text following your suggestion.

**Line 340: "an RH0-T0 nomogram" -> "the RH0-T0 method"**

We modified the text following your suggestion.

**Line 341: "a Tw0-Flow nomogram" -> "the Tw0-Flow method", revise similarly throughout the manuscript**

We modified the text following your suggestion.

**Line 343: "The lowest h is achieved by the RH0-T0 nomogram" -> "The lowest h is from the RH0-T0 method"**

We modified the text following your suggestion.

**Line 400: "radiational cooling" -> "radiative cooling"**

We modified the text following your suggestion.

**Line 420: "The Tw0 for cases" -> "The Tw0 for RASN cases"**

We modified the text following your suggestion.

**Line 428: "A cold RASN case" -> "a RASN case"**

We modified the text following your suggestion.
